# Supplementary material for: Elemental distribution and chemical speciation of copper and cobalt in three metallophytes from the copper–cobalt belt in Northern Zambia
Source: Royal Society of Chemistry journal article supplement (doi:10.1039/c9mt00263d), 2020-04-07
Supplement: c9mt00263d1.pdf [file c9mt00263d1.pdf]

## SUPPLEMENTARY INFORMATION

### **Elemental distribution and chemical speciation of copper and cobalt in three metallophytes from the Copper-Cobalt Belt in Northern Zambia**

Antony van der Ent<sup>1,2</sup>, Peter D. Erskine<sup>1</sup>, Royd Vinya<sup>3</sup>, François Malaisse<sup>4,5</sup>,  
Wojciech J. Przybyłowicz<sup>6,7</sup>, Alban D. Barnabas<sup>8</sup>, Hugh H. Harris<sup>9</sup>, Jolanta Mesjasz-  
Przybyłowicz<sup>7</sup>

<sup>1</sup>Centre for Mined Land Rehabilitation, Sustainable Minerals Institute,  
The University of Queensland, Queensland, Australia.

<sup>2</sup>Université de Lorraine – INRA, Laboratoire Sols et Environnement, UMR 1120, France.

<sup>3</sup>School of Mines & Mineral Sciences, Chemical Engineering Department  
The Copperbelt University, Zambia.

<sup>4</sup>Botanic Garden Meise, Belgium.

<sup>5</sup>Biodiversity and Landscape Unit, Gembloux Agro-Bio Tech, Belgium

<sup>6</sup>AGH University of Science and Technology, Faculty of Physics & Applied Computer  
Science, 30-059 Kraków, Poland.

<sup>7</sup>Department of Botany and Zoology, Stellenbosch University, Private Bag X1, Matieland  
7602, South Africa.

<sup>8</sup>Materials Research Department, iThemba LABS National Research Foundation, PO Box  
722, Somerset West 7129, South Africa.

<sup>9</sup>Department of Chemistry, The University of Adelaide, Australia.

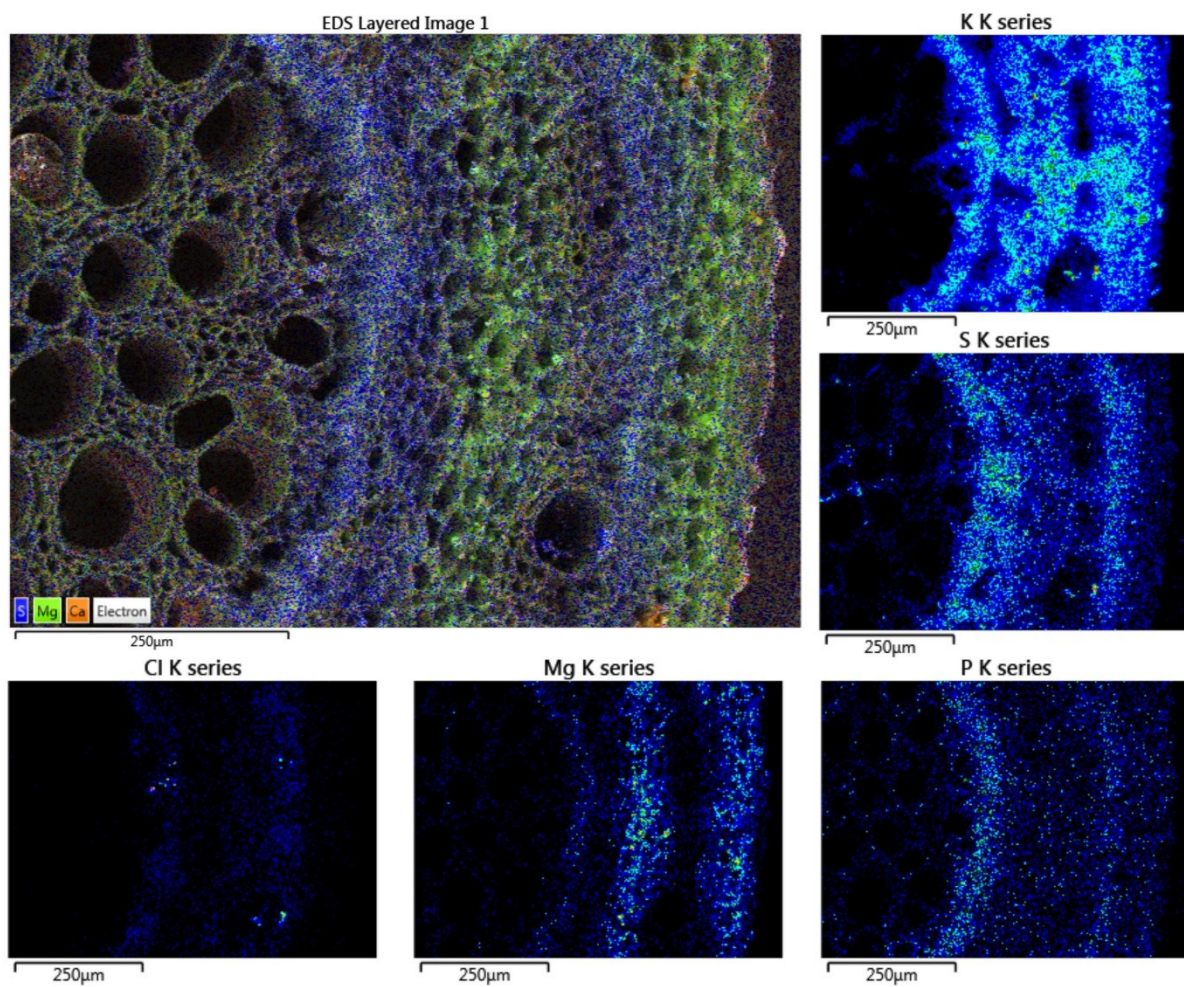

**Supplementary Figure 5.** Scanning Electron Microscopy with Energy-Dispersive Spectroscopy (SEM-EDS) mapping of a *Persicaria punctata* stem section.

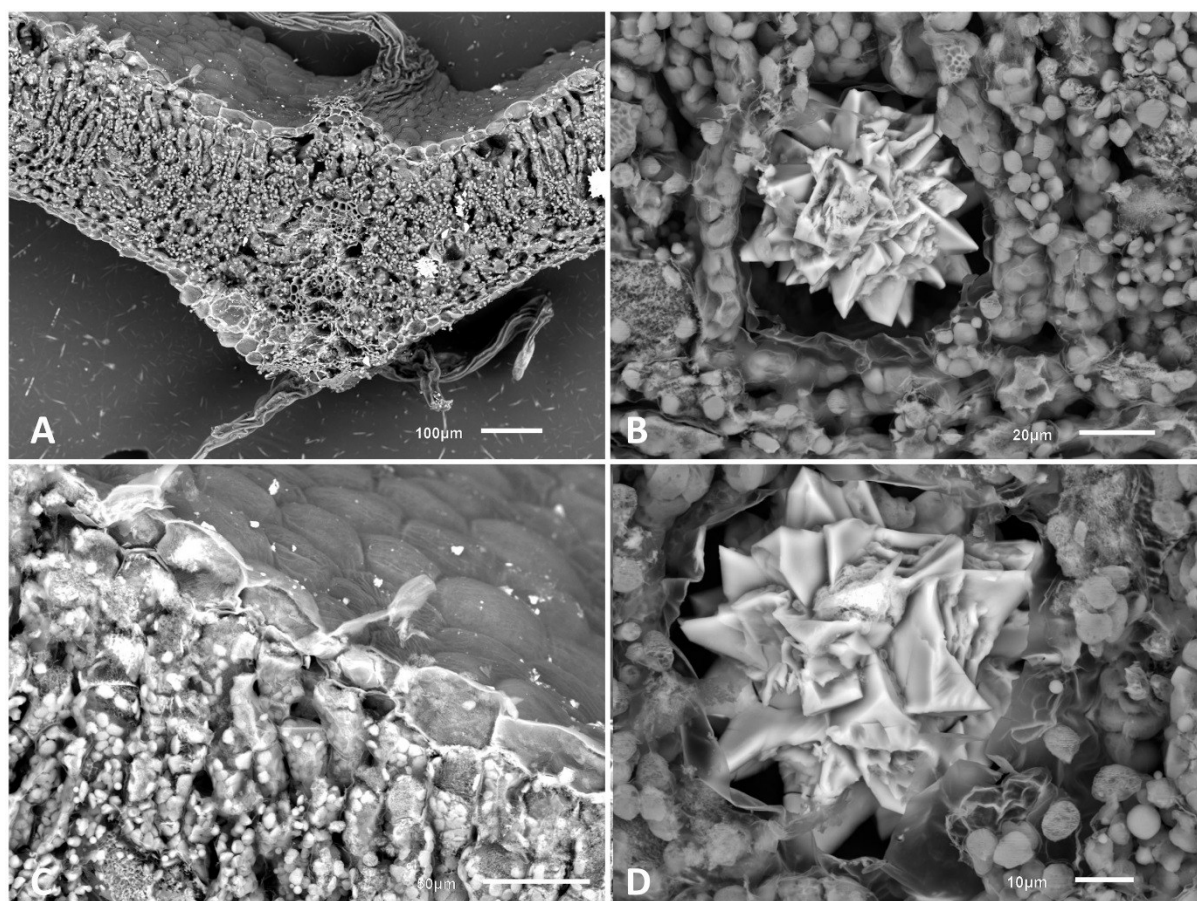

**Supplementary Figure 3.** Scanning Electron Microscopy images of *Persicaria punctata*. Panel A shows the foliar section, and the other panels (B, C, D) show stem sections.

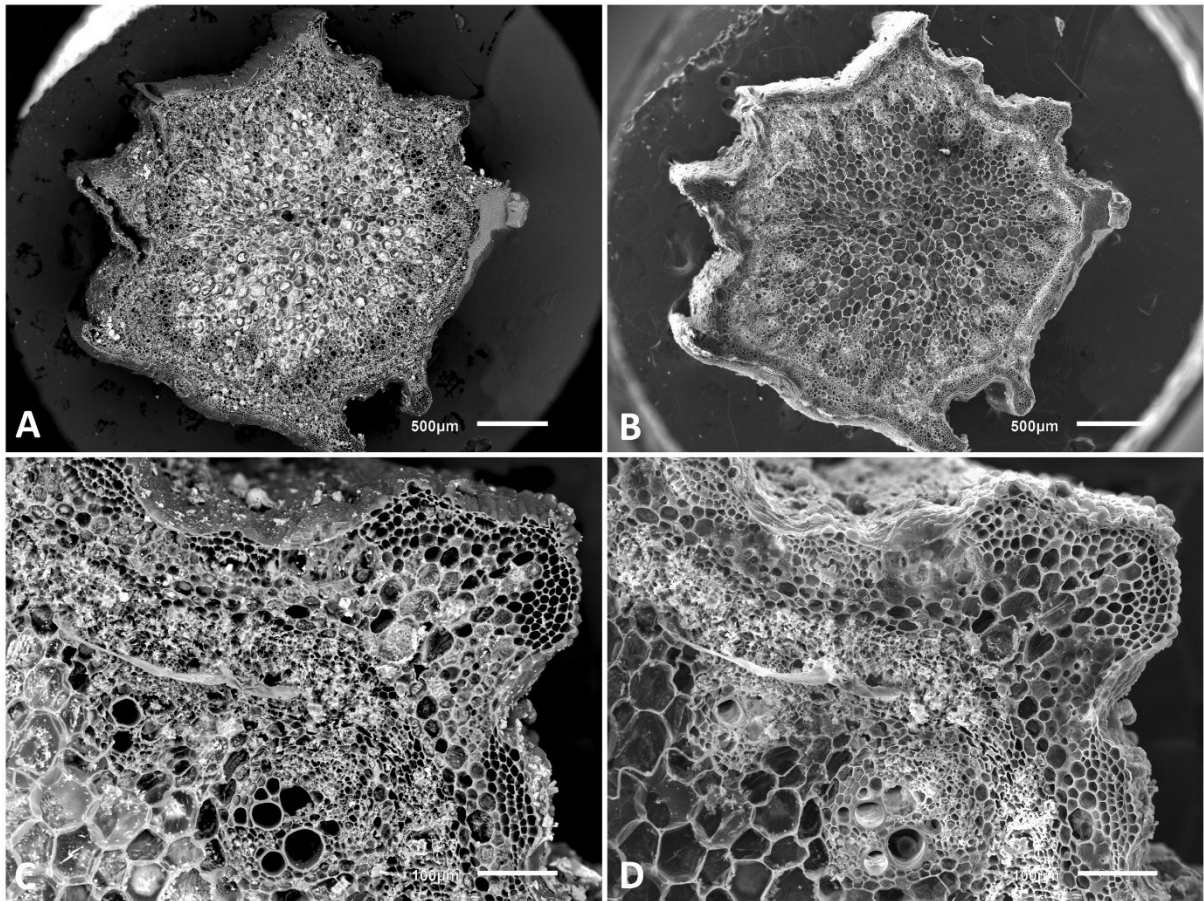

**Supplementary Figure 4.** Scanning Electron Microscopy images of *Persicaria capitata* stem sections (panels A, B, C, D).

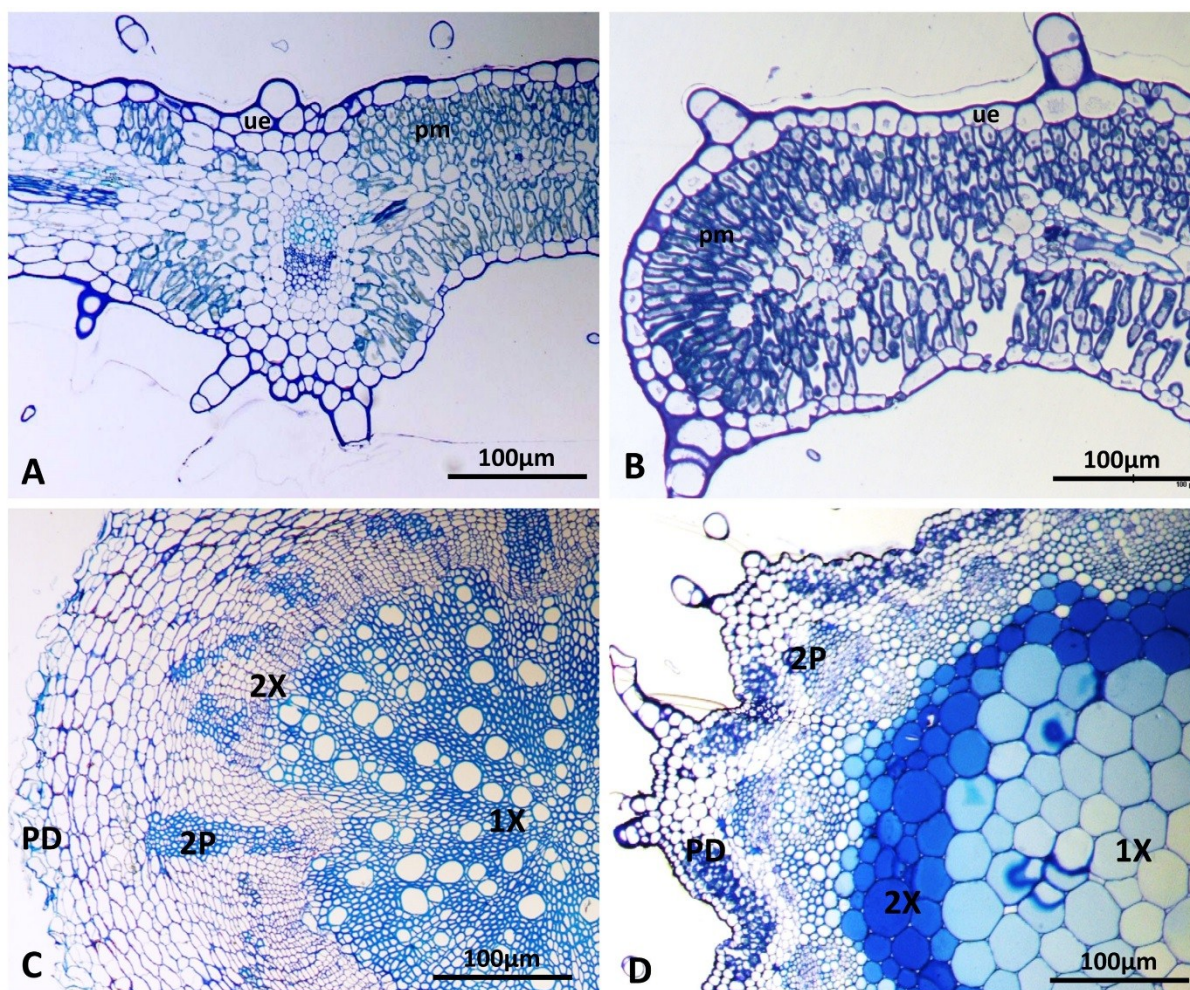

**Supplementary Figure 1.** Light *Conyza cordata* stained with Azur II and methylene blue. The top panels (A, B) show foliar sections, and the lower panels (C, D) show stem sections.

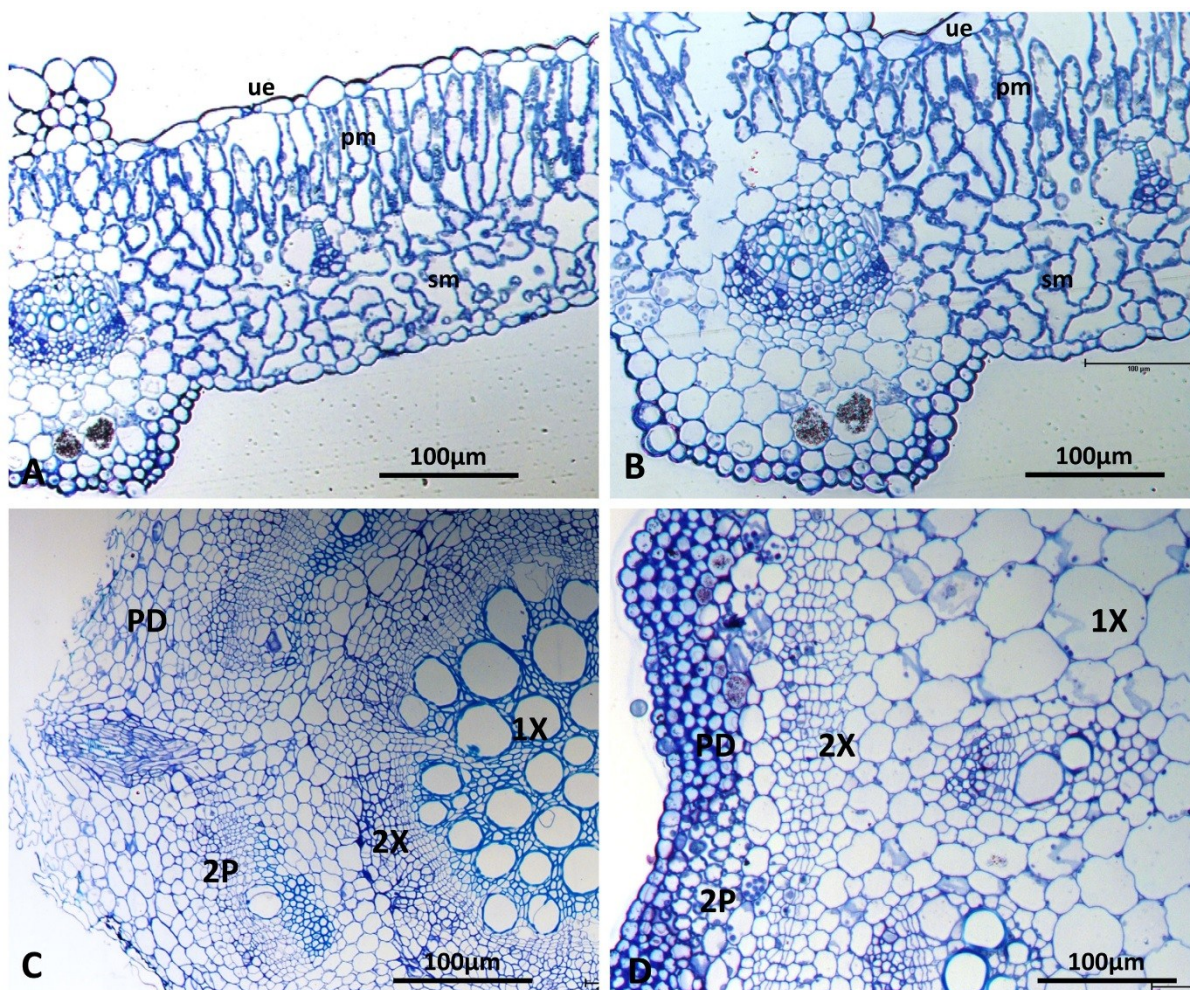

**Supplementary Figure 2.** Light microscopy of histological sections *Persicaria capitata* stained with Azur II and methylene blue. The top panels (A, B) show foliar sections, and the lower panels (C, D) show stem sections.

### **Bulk elemental concentrations in the plant tissues**

In all three species the roots, stems, leaves and flowers were analysed and ranges and means provided in Table 2 (in the main text) for 12 elements. The concentrations of Co and Cu are described in the main text.

In all three species Al concentrations were variable, generally highest in the leaves (up to 1563  $\mu\text{g g}^{-1}$  in *C. cordata*). Calcium (Ca) concentrations were high to extremely high in all three species, especially in the stems and leaves of *P. punctata* (up to 3.5 wt% and 2.4 wt% respectively) and in the stems and leaves of *C. cordata* (up to 1.8 wt% in either). Calcium was mainly present in the form of abundant Ca crystalline deposits (likely Ca-oxalate), visible in

the SEM images (Suppl. Fig. 3). Bulk K concentrations were also high, with up to 5.6 wt% in the stems of *C. cordata*, and up to 3.6 wt% in the stems of *P. puncata*, and 3.9 wt% in the flowers of *P. capitata*, albeit 3-fold lower in *P. capitata* stem. Magnesium (Mg) concentrations were high with up to 3.2 wt% in the leaves of *P. puncata*. Sulfur (S) concentrations were highest in *P. puncata* with a mean of 1.2 wt% in the leaves, but substantially lower in *P. capitata* (mean of 916  $\mu\text{g g}^{-1}$ ) and *C. cordata* (mean of 3752  $\mu\text{g g}^{-1}$ ). The concentrations of Fe (up to 626  $\mu\text{g g}^{-1}$  in the flowers of *C. cordata*, Mn (up to 113  $\mu\text{g g}^{-1}$  also in the flowers of *C. cordata*) and Zn (up to 524  $\mu\text{g g}^{-1}$  in the roots of *P. capitata*) were unremarkable. Prevailing plant Ni concentrations were higher than expected from a plant growing on a non-ultramafic soil but can be explained by the (slight) enrichment of this element in the contaminated soils (maximum of 57  $\mu\text{g g}^{-1}$  in the rhizosphere of *P. capitata*). The highest concentration was in the flowers of *P. capitata* with up to 150  $\mu\text{g g}^{-1}$  Ni.

### **Elemental distribution in the plant tissues (micro-PIXE)**

The spatial distribution of 14 elements - Cu, Co and a range of macro-nutrients (Ca, K, P, S) as well as minor and trace elements, was studied in *P. capitata*, *P. puncata* and *C. cordata* using the nuclear microprobe. For all three species, transverse cross-sections of the roots, stems and leaves were imaged and elemental maps produced, and concentrations in different morphological structures were obtained (Tables 3, 4, 5, Figures 5, 6, 7 in the main text). The results for P, S, Cl, K, Ca and Fe are described on the basis of one representative map for roots, stems and leaves, presented in the respective figures and tables. The results for Co and Cu are described in the main text.

**Roots** – The concentrations of P are comparable in all three species, between 620  $\mu\text{g g}^{-1}$  and 890  $\mu\text{g g}^{-1}$  on average in the whole sectioned areas. The highest values were found in the phloem of *C. cordata* (3480  $\mu\text{g g}^{-1}$ ) and *P. puncata*, 2300  $\mu\text{g g}^{-1}$  in the outer phloem. Sulfur (S) concentration is the highest in *P. puncata*, on average 4660  $\mu\text{g g}^{-1}$ , about twice as high as in *P. capitata* (2480  $\mu\text{g g}^{-1}$ ) and almost five times more than in *C. cordata* (970  $\mu\text{g g}^{-1}$ ). The distribution of this element shows notable differences (Figure 5, Table 3), as follows: in *P. puncata* the highest enrichment is in the inner phloem (7340  $\mu\text{g g}^{-1}$ ), and the concentrations in the epidermis, outer cortex and outer phloem are very similar, of the order of 5000–5500  $\mu\text{g g}^{-1}$ . In *P. capitata* the highest value was found in the cortex (6000  $\mu\text{g g}^{-1}$ ), twice as high as in the phloem and almost six times higher than in the epidermis. In *C. cordata* S is enriched in the wide outer ring comprising epidermis, phloem and cortex, with the concentrations in the 1100–

1800  $\mu\text{g g}^{-1}$  range (Figure 5, Table 3). Chlorine concentrations are in the order of 2000  $\mu\text{g g}^{-1}$  in the whole mapped areas (between 1800  $\mu\text{g g}^{-1}$  and 2140  $\mu\text{g g}^{-1}$ ). In *P. punctata* and *C. cordata* the highest amounts are in the cortex (5000  $\mu\text{g g}^{-1}$  and 5750  $\mu\text{g g}^{-1}$  in the inner cortex, respectively), while in *P. capitata* the highest concentrations are in the phloem (7240  $\mu\text{g g}^{-1}$ ). The concentration of K is more than three times higher in *P. punctata* in comparison with *P. capitata* and *C. cordata* (3.07 wt% versus 0.87 wt% and 0.86 wt%, respectively). In all three species the highest enrichment is in the cortex and phloem (Table 3). Calcium concentrations are one order of magnitude lower, between 1440  $\mu\text{g g}^{-1}$  in *C. cordata* and 1730  $\mu\text{g g}^{-1}$  in *P. punctata*. The highest values are either in the epidermis (*P. punctata* and *P. capitata*) or in the cortex and epidermis (*C. cordata*). The only tissue with Fe enrichment is the epidermis, as is observed in all three species.

**Stems** – The highest concentrations of P are in *P. capitata* (490  $\mu\text{g g}^{-1}$ ), more than twice than in *P. punctata* (200  $\mu\text{g g}^{-1}$ ) and *C. cordata* (160  $\mu\text{g g}^{-1}$ ). In *P. capitata* the highest enrichment is in the phloem (1260  $\mu\text{g g}^{-1}$ ), while in *C. cordata* in the cambium (880  $\mu\text{g g}^{-1}$ ) and cortex (830  $\mu\text{g g}^{-1}$ ). In *P. punctata* the highest concentration was found in the cortex (450  $\mu\text{g g}^{-1}$ ) and slightly lower value in the epidermis (430  $\mu\text{g g}^{-1}$ ). Average concentrations of S in the mapped stem cross sections vary from 1890  $\mu\text{g g}^{-1}$  in *P. capitata* up to 3770  $\mu\text{g g}^{-1}$  and 4900  $\mu\text{g g}^{-1}$  in *C. cordata* and *P. punctata*, respectively. In *P. capitata* the highest concentrations were found in the phloem, while in *P. punctata* in the meristematic cortex (9480  $\mu\text{g g}^{-1}$ ). In *C. cordata* the highest values are in the pith, especially in the outer pith (10 350  $\mu\text{g g}^{-1}$ ). Chlorine concentrations and distribution vary significantly among the species. The lowest concentrations were found in *P. punctata*, 520  $\mu\text{g g}^{-1}$  in the whole mapped area, with enrichment in the pith and outer pith (760  $\mu\text{g g}^{-1}$  and 800  $\mu\text{g g}^{-1}$ , respectively). In *C. cordata* Cl reaches 2300  $\mu\text{g g}^{-1}$  in the whole mapped area, with the highest concentration in the cortex (5230  $\mu\text{g g}^{-1}$ ). In *P. capitata* the respective concentration is about three times higher (6230  $\mu\text{g g}^{-1}$ ); the highest concentration was also found in the cortex (8670  $\mu\text{g g}^{-1}$ ). The highest concentration of K is in *P. punctata* (5.97 wt% in the whole mapped area), more than three times higher in comparison with *C. cordata* (1.75 wt%) and almost five times higher than in *P. capitata* (1.28 wt%). In all three species the highest concentrations were found in the cortex (Table 4). The concentration of Ca in *P. punctata* and *P. capitata* is comparable (2100  $\mu\text{g g}^{-1}$  and 1700  $\mu\text{g g}^{-1}$ , respectively). In *P. punctata* the highest enrichment is in the inner pith (3150  $\mu\text{g g}^{-1}$ ), while in *P. capitata* it is in the cortex (3440  $\mu\text{g g}^{-1}$ ). In both species small regions were identified, in

which calcium concentration far exceeded the values found in all other structures, reaching on average 1.94 wt% in *P. puncata* and 1.05 wt% in *P. capitata*. The average concentration of this element in *C. cordata* was much higher, 7900  $\mu\text{g g}^{-1}$  in the whole stem cross section, with the highest enrichment in the pith (1.48 wt%) and the outer pith (1.86 wt%). In all three species epidermis was the only structure with high Fe enrichment (Table 4).

**Leaves** – The concentrations of P are very similar in *P. puncata* and *C. cordata* (1010  $\mu\text{g g}^{-1}$  and 1060  $\mu\text{g g}^{-1}$  in the whole area of leaf cross section). In *P. puncata* the highest concentration of this element is in the palisade mesophyll (1460  $\mu\text{g g}^{-1}$ ) and phloem (1330  $\mu\text{g g}^{-1}$ ), while in *C. cordata* the concentration in the phloem (2060  $\mu\text{g g}^{-1}$ ) is few times higher than in any other morphological structure. *P. capitata* is significantly depleted in P in comparison with the two former species, with the average concentration of only 340  $\mu\text{g g}^{-1}$ . Sulfur concentration is the highest in *P. puncata*, with the average value in the whole leaf cross section area reaching 8000  $\mu\text{g g}^{-1}$ . The highest values are in the palisade mesophyll (9070  $\mu\text{g g}^{-1}$ ), and slightly lower values (in the 7000–8000  $\mu\text{g g}^{-1}$  range) in the xylem, phloem, spongy mesophyll and vascular bundles. The lowest concentrations were found in the lower and upper epidermis (2060 and 3100  $\mu\text{g g}^{-1}$ , respectively). The concentration of this element in *C. cordata* is significantly lower (4270  $\mu\text{g g}^{-1}$ ), with the maximum in the minor vein vascular bundles and the lowest values in the upper and lower epidermis, and hairs (Table 5). Sulfur concentration in *P. capitata* is the lowest of all three species (2000  $\mu\text{g g}^{-1}$  in the whole area of the measured cross leaf cross section), with the highest value in the main vein vascular bundles (3300  $\mu\text{g g}^{-1}$ ) and the lowest in the minor vein vascular bundles (420  $\mu\text{g g}^{-1}$ ). Chlorine concentration is the highest in *P. capitata* (7610  $\mu\text{g g}^{-1}$  in the whole cross section), somewhat lower in *C. cordata* (6800  $\mu\text{g g}^{-1}$ ) and much lower in *P. puncata* (1920  $\mu\text{g g}^{-1}$ ). In *P. capitata* the highest enrichment in this element is in the upper epidermis, and the lower collenchyma, and the lowest in the spongy mesophyll (Table 5). In *C. cordata* the highest concentration is in the midrib parenchyma (2.04 wt%), while the lowest values were found in the palisade mesophyll, xylem and minor vein vascular bundles. In *P. puncata* significant enrichment in this element was in the upper epidermis, collenchyma and midrib parenchyma (in the order of 5300–5500  $\mu\text{g g}^{-1}$ ), while the lowest values were noted in the minor vein vascular bundles (Table 5). The highest concentrations of K were found in *C. cordata* (2.1 wt% in the whole cross section area), with the highest enrichment in the midrib parenchyma (4.48 wt%) and phloem (3.12 wt%) and the lowest concentration in the minor vein vascular bundles (0.94 wt%). Somewhat lower concentrations are in *P. puncata* (1.7 wt% in the whole cross section area). The highest values were found in the lower collenchyma and

spongy mesophyll, slightly exceeding 2.6 wt% (Table 4). The concentrations in other tissues do not show major differences, with values between 1.6 and 2.2 wt%, with the exception of the palisade mesophyll (0.9 wt%) and lower epidermis (0.72 wt%). *Persicaria capitata* is characterised by significantly lower concentration of K (1.1 wt% in the whole cross section area). Here the highest concentrations are in the midrib parenchyma (1.94 wt%) and the lowest in the palisade mesophyll and lower epidermis (0.45 wt% in both cases).

The average concentrations of Ca in *P. capitata* and *C. cordata* are similar (6260  $\mu\text{g g}^{-1}$  and 6940  $\mu\text{g g}^{-1}$ , respectively), while in *P. punctata* they are significantly lower (2290  $\mu\text{g g}^{-1}$ ). In the latter species the highest concentrations were found in the minor vein vascular bundles (1.06 wt%) and midrib parenchyma (0.92 wt%). The lowest concentration of this element in *P. punctata* was in the palisade mesophyll (only 174  $\mu\text{g g}^{-1}$ ). In *P. capitata* the highest Ca enrichment is in the minor vein vascular bundles (4.09 wt%), almost twice higher than in the lower collenchyma (2.15 wt%). The lowest value was identified in the palisade mesophyll (405  $\mu\text{g g}^{-1}$ ). In *C. cordata* the highest concentrations are in the hairs (upper and lower) and in the minor vein vascular bundles (Table 5). In all three species epidermis was the only structure with high Fe enrichment, and the upper epidermis always showed higher enrichment than the lower epidermis, especially in *P. punctata* (Table 5).
